# Supplementary material for: Characterization of the selenocysteine-containing metabolome in selenium-rich yeast : Part 1. Identification of new species by multi-dimensional liquid chromatography with parallel ICP-MS and electrospray Q-TOFMS/MS detection
Source: Royal Society of Chemistry journal article supplement (doi:10.1039/b708294k), 2007-09-27
Supplement: esi_figure.pdf [file esi_figure.pdf]

## Electronic Supplementary Information (ESI) for the article entitled:

### *Characterization of the selenocysteine-containing metabolome in selenium-rich yeast. Part I. Identification of new species by multi-dimensional liquid chromatography with parallel ICP-MS and electrospray Q-TOF MS/MS detection*

by Mihaly Dernovics and Ryszard Lobinski\*

Published in the Journal of Analytical Atomic Spectrometry

ESI Fig.

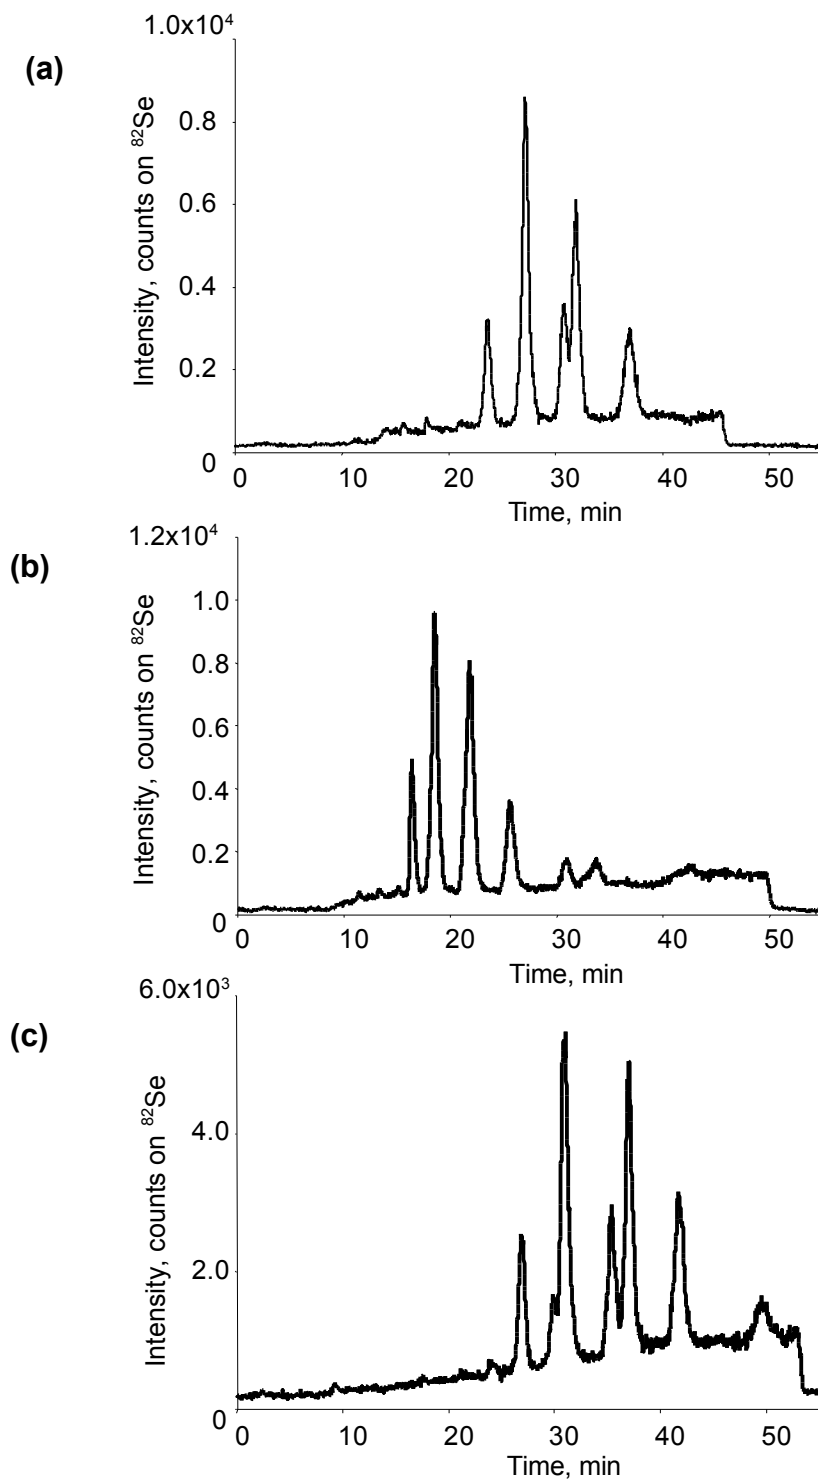

**ESI Fig.** (a) – (c) Optimisation of the analytical scale SAX separation of the collected SEC fraction monitored with ICP-MS chromatogram. For the applied gradient see text. The parameters and recovery values were as follows: (a) pH=7.0, buffer A: 20 mM  $\text{NH}_4\text{Ac}$ , buffer B: 200 mM  $\text{NH}_4\text{Ac}$ , column recovery 90%; (b) pH=4.5, buffer A: 25 mM  $\text{NH}_4\text{Ac}$ , buffer B: 250 mM  $\text{NH}_4\text{Ac}$ , column recovery 99%; (c) pH=5.5, buffer A: 20 mM  $\text{NH}_4\text{Ac}$ , buffer B: 200 mM  $\text{NH}_4\text{Ac}$ , column recovery 93%.
